# Supplementary material for: Rational design of phenoxazine-based donor–acceptor–donor thermally activated delayed fluorescent molecules with high performance
Source: Royal Society of Chemistry journal article supplement (doi:10.1039/c5cp02810h), 2015-01-01
Supplement: c5cp02810h1.pdf [file c5cp02810h1.pdf]

## Electronic Supplementary Information

# Rational Design of Phenoxazine-based Donor-Acceptor-Donor Thermally Activated Delayed Fluorescence Molecules with High Performance

Jing Lu, Yiyang Zheng, and Jingping Zhang\*

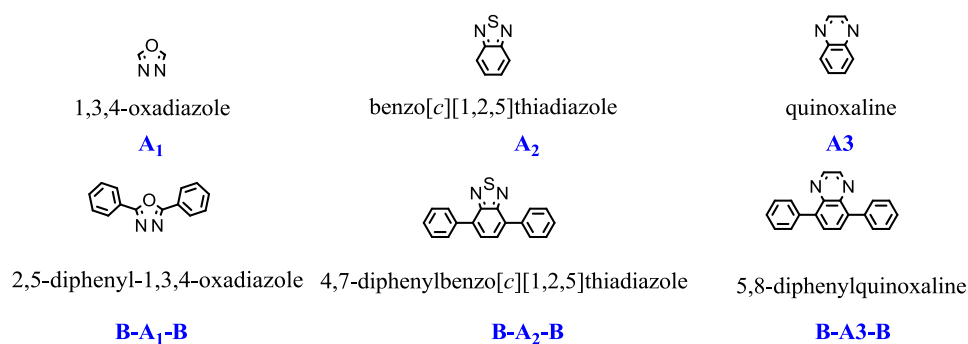

**Fig. S1** The chemical structures of these investigated acceptors.

### Methodology

**Table S1** The calculated  $\Delta E_{ST}$  values of D-B-A<sub>1</sub>-B-D in toluene using TD-DFT method.

|                 | B3LYP | CAM-B3LYP                  | PBE0        | Expt. <sup>[1]</sup> |
|-----------------|-------|----------------------------|-------------|----------------------|
| $\Delta E_{ST}$ | 0.01  | 0.54 [0.57] <sup>[1]</sup> | <b>0.13</b> | <b>0.15</b>          |

[1] The data come from Ref. [22]

Firstly, we optimized the first singlet ( $S_1$ ) and triplet ( $T_1$ ) excited states using TD-B3LYP, TD-CAM-B3LYP, and TD-PBE0 with cc-pVDZ basis set, respectively. Secondly, on the basis of the optimized  $S_1$  and  $T_1$  states, the relative singlet and triplet excitation energy levels were computed using polarizable continuum model (PCM) in toluene. The calculated  $\Delta E_{ST}$  values are listed in Table S1, the most suitable method is found to be PBE0, which provides the closest  $\Delta E_{ST}$  to experimental value.

### The choice of acceptors

**Table S2** The calculated energy levels of HOMO (H) and LUMO (L) for donor (D) and different acceptors (As).

| D | B-A <sub>1</sub> -B | A <sub>1</sub> | B-A <sub>2</sub> -B | A <sub>2</sub> | B-A <sub>3</sub> -B | A <sub>3</sub> |
|---|---------------------|----------------|---------------------|----------------|---------------------|----------------|
|---|---------------------|----------------|---------------------|----------------|---------------------|----------------|

|              |        |               |        |               |        |               |        |
|--------------|--------|---------------|--------|---------------|--------|---------------|--------|
| E (L)        | -0.317 | <b>-1.645</b> | -0.346 | <b>-2.574</b> | -2.307 | <b>-2.037</b> | -1.932 |
| E (H)        | -5.051 | <b>-6.507</b> | -8.145 | <b>-6.003</b> | -6.977 | <b>-6.219</b> | -7.089 |
| $\Delta E_L$ |        | <b>1.328</b>  | 0.028  | <b>2.257</b>  | 1.989  | <b>1.719</b>  | 1.615  |
| $\Delta E_H$ |        | <b>1.456</b>  | 3.094  | <b>0.951</b>  | 1.938  | <b>1.168</b>  | 2.038  |

### The optimized structural parameters

**Table S3a** The optimized bond length ( $\text{\AA}$ ), bond angle ( $^\circ$ ), and dihedral angle ( $^\circ$ ) of the  $A_i$ , B- $A_i$ -B, D-B- $A_i$ -B, and D-B- $A_i$ -B-D ( $i=1-3$ ).

| 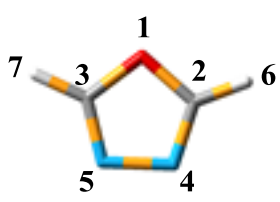   |       |    |       |    |              |
|-------------------------------------------------------------------------------------|-------|-------------------------------------------------------------------------------------|-------|---------------------------------------------------------------------------------------|--------------|
| $A_1$                                                                               |       | $A_2$                                                                               |       | $A_3$                                                                                 |              |
| R(1, 2)                                                                             | 1.350 | R(1, 2)                                                                             | 1.639 | R(1, 2)                                                                               | 1.416        |
| R(1, 3)                                                                             | 1.350 | R(1, 3)                                                                             | 1.639 | R(2, 3)                                                                               | 1.426        |
| R(2, 4)                                                                             | 1.289 | R(2, 4)                                                                             | 1.336 | R(3, 4)                                                                               | 1.416        |
| R(3, 5)                                                                             | 1.289 | R(3, 5)                                                                             | 1.336 | R(4, 5)                                                                               | 1.375        |
| R(4, 5)                                                                             | 1.386 | R(4, 5)                                                                             | 1.446 | R(5, 6)                                                                               | <b>1.417</b> |
| R(2, 6)                                                                             | 1.086 | R(4, 6)                                                                             | 1.423 | R(6, 1)                                                                               | <b>1.375</b> |
| R(3, 7)                                                                             | 1.086 | R(5, 7)                                                                             | 1.423 | R(2, 7)                                                                               | 1.361        |
| $\alpha$ (1, 2, 6)                                                                  | 118.1 | R(6, 8)                                                                             | 1.369 | R(7, 8)                                                                               | 1.312        |
| $\alpha$ (1, 3, 7)                                                                  | 118.1 | R(7, 9)                                                                             | 1.369 | R(8, 9)                                                                               | 1.419        |
|                                                                                     |       | R(8, 9)                                                                             | 1.430 | R(9, 10)                                                                              | 1.312        |
|                                                                                     |       | $\alpha$ (4, 6, 10)                                                                 | 119.6 | R(10, 3)                                                                              | 1.361        |
|                                                                                     |       | $\alpha$ (5, 7, 11)                                                                 | 119.6 | $\alpha$ (2, 1, 11)                                                                   | 117.7        |
|                                                                                     |       |                                                                                     |       | $\alpha$ (3, 4, 12)                                                                   | <b>117.7</b> |
|  |       |  |       |  |              |
| $B-A_1-B$                                                                           |       | $B-A_2-B$                                                                           |       | $B-A_3-B$                                                                             |              |

|                    |       |                     |       |                    |       |
|--------------------|-------|---------------------|-------|--------------------|-------|
| R(1, 2)            | 1.356 | R(1, 2)             | 1.632 | R(1, 2)            | 1.431 |
| R(1, 3)            | 1.356 | R(1, 3)             | 1.632 | R(2, 3)            | 1.433 |
| R(2, 4)            | 1.300 | R(2, 4)             | 1.335 | R(3, 4)            | 1.431 |
| R(3, 5)            | 1.300 | R(3, 5)             | 1.335 | R(4, 5)            | 1.383 |
| R(4, 5)            | 1.369 | R(4, 5)             | 1.463 | R(5, 6)            | 1.407 |
| R(2, 6)            | 1.454 | R(4, 6)             | 1.442 | R(6, 1)            | 1.383 |
| R(3, 7)            | 1.454 | R(5, 7)             | 1.442 | R(1, 7)            | 1.481 |
| $\alpha$ (1, 2, 6) | 119.9 | R(6, 8)             | 1.381 | R(7, 9)            | 1.403 |
| $\alpha$ (1, 3, 7) | 119.9 | R(7, 9)             | 1.381 | R(9, 11)           | 1.391 |
| $\beta$ (1,2,6,8)  | 0.0   | R(8, 9)             | 1.413 | R(11, 13)          | 1.394 |
| $\beta$ (1,3,7,9)  | 0.0   | $\alpha$ (4, 6, 10) | 124.8 | R(13, 15)          | 1.393 |
|                    |       | $\alpha$ (5, 7, 11) | 124.8 | R(15, 17)          | 1.393 |
|                    |       | $\beta$ (4,6,10,12) | 0.0   | R(17, 7)           | 1.403 |
|                    |       | $\beta$ (5,7,11,13) | 0.0   | $\alpha$ (2, 1, 7) | 122.7 |
|                    |       |                     |       | $\beta$ (2,1,7,9)  | -46.8 |

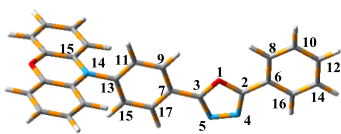

D-B-A<sub>1</sub>-B

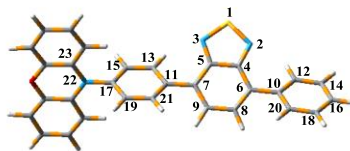

D-B-A<sub>2</sub>-B

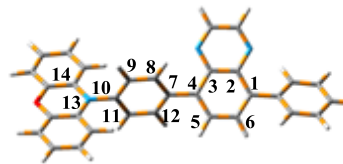

D-B-A<sub>3</sub>-B

|                       |       |                     |       |                    |       |
|-----------------------|-------|---------------------|-------|--------------------|-------|
| R(1, 2)               | 1.357 | R(1, 2)             | 1.635 | R(1, 2)            | 1.432 |
| R(1, 3)               | 1.356 | R(1, 3)             | 1.636 | R(2, 3)            | 1.432 |
| R(2, 4)               | 1.301 | R(2, 4)             | 1.335 | R(3, 4)            | 1.431 |
| R(3, 5)               | 1.300 | R(3, 5)             | 1.335 | R(4, 5)            | 1.383 |
| R(4, 5)               | 1.369 | R(4, 5)             | 1.452 | R(5, 6)            | 1.407 |
| R(2, 6)               | 1.454 | R(4, 6)             | 1.436 | R(6, 1)            | 1.383 |
| R(3, 7)               | 1.454 | R(5, 7)             | 1.436 | R(4, 7)            | 1.481 |
| $\alpha$ (1, 2, 6)    | 119.9 | R(6, 8)             | 1.378 | R(7, 8)            | 1.403 |
| $\alpha$ (1, 3, 7)    | 119.9 | R(7, 9)             | 1.379 | R(8, 9)            | 1.390 |
| $\beta$ (1,2,6,8)     | -0.1  | R(8, 9)             | 1.419 | R(9, 10)           | 1.396 |
| $\beta$ (1,3,7,9)     | -0.2  | $\alpha$ (4, 6, 10) | 122.9 | R(10, 11)          | 1.395 |
| $\beta$ (11,13,14,15) | 93.0  | $\alpha$ (5, 7, 11) | 122.9 | R(11, 12)          | 1.392 |
|                       |       | $\beta$ (4,6,10,12) | -37.5 | R(12, 7)           | 1.403 |
|                       |       | $\beta$ (5,7,11,13) | 36.4  | $\alpha$ (3, 4, 7) | 122.5 |

|       |                                                                                   |                       |                                                                                   |                      |                                                                                     |       |
|-------|-----------------------------------------------------------------------------------|-----------------------|-----------------------------------------------------------------------------------|----------------------|-------------------------------------------------------------------------------------|-------|
|       |                                                                                   | $\beta$ (15,17,22,23) | -90.1                                                                             | $\beta$ (3,4,7,8)    | -46.5                                                                               |       |
|       |                                                                                   |                       |                                                                                   | $\alpha$ (9, 10, 13) | 120.3                                                                               |       |
|       |                                                                                   |                       |                                                                                   | $\beta$ (9,10,11,13) | 88.9                                                                                |       |
| <hr/> |                                                                                   |                       |                                                                                   |                      |                                                                                     |       |
|       | 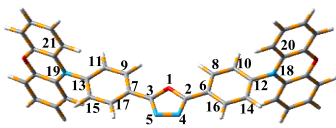 |                       |  |                      |  |       |
|       | <b>D-B-A<sub>1</sub>-B-D</b>                                                      |                       | <b>D-B-A<sub>2</sub>-B-D</b>                                                      |                      | <b>D-B-A<sub>3</sub>-B-D</b>                                                        |       |
|       | <b>R(1, 2)</b>                                                                    | 1.356                 | <b>R(1, 2)</b>                                                                    | 1.635                | <b>R(1, 2)</b>                                                                      | 1.383 |
|       | <b>R(1, 3)</b>                                                                    | 1.356                 | <b>R(1, 3)</b>                                                                    | 1.635                | <b>R(2, 3)</b>                                                                      | 1.407 |
|       | <b>R(2, 4)</b>                                                                    | 1.300                 | <b>R(2, 4)</b>                                                                    | 1.335                | <b>R(3, 4)</b>                                                                      | 1.383 |
|       | <b>R(3, 5)</b>                                                                    | 1.300                 | <b>R(3, 5)</b>                                                                    | 1.335                | <b>R(4, 5)</b>                                                                      | 1.431 |
|       | <b>R(4, 5)</b>                                                                    | 1.368                 | <b>R(4, 5)</b>                                                                    | 1.451                | <b>R(5, 6)</b>                                                                      | 1.431 |
|       | <b>R(2, 6)</b>                                                                    | 1.454                 | <b>R(4, 6)</b>                                                                    | 1.436                | <b>R(6, 1)</b>                                                                      | 1.431 |
|       | <b>R(3, 7)</b>                                                                    | 1.454                 | <b>R(5, 7)</b>                                                                    | 1.436                | <b>R(1, 7)</b>                                                                      | 1.481 |
|       | <b>R(12, 18)</b>                                                                  | 1.422                 | <b>R(6, 8)</b>                                                                    | 1.379                | <b>R(7, 8)</b>                                                                      | 1.403 |
|       | <b>R(13, 19)</b>                                                                  | 1.422                 | <b>R(7, 9)</b>                                                                    | 1.379                | <b>R(8, 9)</b>                                                                      | 1.390 |
|       | $\alpha$ (1, 2, 6)                                                                | 119.9                 | <b>R(8, 9)</b>                                                                    | 1.420                | <b>R(9, 10)</b>                                                                     | 1.396 |
|       | $\alpha$ (1, 3, 7)                                                                | 119.9                 | <b>R(17, 22)</b>                                                                  | 1.423                | <b>R(10, 11)</b>                                                                    | 1.395 |
|       | $\beta$ (1,2,6,8)                                                                 | -0.1                  | <b>R(16, 23)</b>                                                                  | 1.423                | <b>R(11, 12)</b>                                                                    | 1.392 |
|       | $\beta$ (1,3,7,9)                                                                 | -0.1                  | $\alpha$ (4, 6, 10)                                                               | 122.7                | <b>R(12, 7)</b>                                                                     | 1.403 |
|       | $\beta$ (11,13,19,21)                                                             | -87.4                 | $\alpha$ (5, 7, 11)                                                               | 122.7                | $\alpha$ (2, 1, 7)                                                                  | 122.4 |
|       | $\beta$ (10,12,18,20)                                                             | 87.4                  | $\beta$ (4,6,10,12)                                                               | -38.4                | $\alpha$ (3, 4, 15)                                                                 | 122.4 |
|       |                                                                                   |                       | $\beta$ (5,7,11,13)                                                               | -38.4                | $\beta$ (16,17,18,19)                                                               | 89.1  |
|       |                                                                                   |                       | $\beta$ (14,16,23,24)                                                             | 85.3                 | $\beta$ (9, 10, 13,14)                                                              | -89.1 |
|       |                                                                                   |                       | $\beta$ (15,17,22,25)                                                             | 85.3                 |                                                                                     |       |
| <hr/> |                                                                                   |                       |                                                                                   |                      |                                                                                     |       |

**Table S3b** The optimized bond length (Å), bond angle (°), and dihedral angle (°) of the D-A<sub>i</sub>-D (i=2, 3).

|  |                                                                                     |       |                                                                                      |       |
|--|-------------------------------------------------------------------------------------|-------|--------------------------------------------------------------------------------------|-------|
|  | 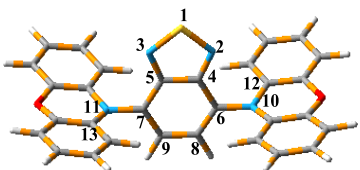 |       |  |       |
|  | <b>D-A<sub>2</sub>-D</b>                                                            |       | <b>D-A<sub>3</sub>-D</b>                                                             |       |
|  | <b>R(1, 2)</b>                                                                      | 1.636 | <b>R(1, 2)</b>                                                                       | 1.420 |
|  | <b>R(1, 3)</b>                                                                      | 1.636 | <b>R(1, 3)</b>                                                                       | 1.312 |

|                     |       |                     |       |
|---------------------|-------|---------------------|-------|
| <b>R(2, 4)</b>      | 1.334 | <b>R(2, 4)</b>      | 1.312 |
| <b>R(3, 5)</b>      | 1.334 | <b>R(3, 5)</b>      | 1.357 |
| <b>R(4, 6)</b>      | 1.443 | <b>R(4, 6)</b>      | 1.357 |
| <b>R(5, 6)</b>      | 1.432 | <b>R(5, 6)</b>      | 1.424 |
| <b>R(5, 7)</b>      | 1.432 | <b>R(5, 7)</b>      | 1.428 |
| <b>R(6, 8)</b>      | 1.371 | <b>R(6, 8)</b>      | 1.428 |
| <b>R(7, 9)</b>      | 1.371 | <b>R(7, 9)</b>      | 1.376 |
| <b>R(8, 9)</b>      | 1.427 | <b>R(8, 10)</b>     | 1.376 |
| <b>R(6, 10)</b>     | 1.415 | <b>R(9, 10)</b>     | 1.414 |
| <b>R(7, 11)</b>     | 1.415 | <b>R(7, 11)</b>     | 1.418 |
| $\alpha$ (4, 6, 10) | 120.9 | <b>R(8, 12)</b>     | 1.418 |
| $\alpha$ (5, 7, 11) | 120.9 | $\alpha$ (5, 7, 11) | 120.0 |
| $\beta$ (4,6,10,12) | -79.4 | $\alpha$ (6, 8, 12) | 120.0 |
| $\beta$ (5,7,11,13) | -79.4 | $\beta$ (5,7,11,13) | -81.1 |
|                     |       | $\beta$ (6,8,12,14) | 81.1  |

### Singlet-triplet energy gap

In Table S2, The LUMO energy level of  $A_1$  is similar with that of D, indicating that the match between  $A_1$  and D is not expected. However,  $A_2$ , and  $A_3$  moieties can be also as strong electron withdrawing fragments with lower LUMO energy levels, even if the electron withdrawing strength are weaker than relative B- $A_i$ -B due to shortening the  $\pi$ -conjugation. As a comparison, we calculated the  $\Delta E_{ST}$  values for the D- $A_i$ -D ( $i=2, 3$ ) topologic molecules. The calculated twist angles between D and A are within  $79.4^\circ$  and  $-81.1^\circ$  for D- $A_i$ -D ( $i=2, 3$ ) from the optimized geometries in  $S_0$  states by DFT, respectively. The electron density plots of HOMO and LUMO are also exhibited an effective separation between  $A_i$  and D fragments. Thus the D- $A_i$ -D molecules are also as efficient TADF candidates. The calculated  $\Delta E_{ST}$  values for D- $A_i$ -D are 0.13 eV and 0.26 eV, respectively, which are larger than relative D-B- $A_i$ -B-D ones due to the reducing of electron withdrawing strength.

### Frontier molecular orbital

**Table S4** The electron density plots of frontier molecular orbitals and the percentage of electronic distribution.

|               |   | D   | B    | $A_i$ | B    | D                                                                                     |
|---------------|---|-----|------|-------|------|---------------------------------------------------------------------------------------|
| D-B- $A_1$ -B | L | 1.4 | 40.5 | 34.3  | 23.8 | 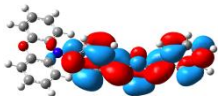 |

|                              |          |      |      |      |      |                                                                                       |                                                                                       |
|------------------------------|----------|------|------|------|------|---------------------------------------------------------------------------------------|---------------------------------------------------------------------------------------|
|                              | <b>H</b> | 97.4 | 2.6  | 0.0  | 0.0  | 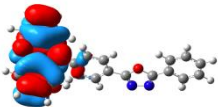   |                                                                                       |
| <b>D-B-A<sub>1</sub>-B-D</b> | <b>L</b> | 1.1  | 32.0 | 33.9 | 32.0 | 1.1                                                                                   |    |
|                              | <b>H</b> | 0.0  | 0.0  | 0.0  | 2.6  | 97.4                                                                                  |    |
| <b>D-B-A<sub>2</sub>-B</b>   | <b>L</b> | 0.0  | 6.3  | 88.4 | 5.3  |    |                                                                                       |
|                              | <b>H</b> | 97.4 | 2.6  | 0.0  | 0.0  |    |                                                                                       |
| <b>D-B-A<sub>2</sub>-B-D</b> | <b>L</b> | 0.2  | 5.8  | 88.1 | 5.8  | 0.2                                                                                   |    |
|                              | <b>H</b> | 48.6 | 1.4  | 0.0  | 1.4  | 48.6                                                                                  |   |
| <b>D-B-A<sub>3</sub>-B</b>   | <b>L</b> | 0.2  | 5.5  | 89.9 | 4.4  |  |                                                                                       |
|                              | <b>H</b> | 97.4 | 2.6  | 0.0  | 0.0  |  |                                                                                       |
| <b>D-B-A<sub>3</sub>-B-D</b> | <b>L</b> | 0.2  | 5.3  | 89.0 | 5.3  | 0.2                                                                                   |  |
|                              | <b>H</b> | 50.9 | 1.3  | 0.0  | 1.3  | 46.5                                                                                  |  |
| <b>D-A<sub>2</sub>-D</b>     | <b>L</b> | 0.9  | -    | 98.3 | -    | 0.9                                                                                   |  |

|                          |          |      |   |      |   |      |                                                                                     |
|--------------------------|----------|------|---|------|---|------|-------------------------------------------------------------------------------------|
|                          | <b>H</b> | 48.6 | - | 2.8  | - | 48.6 |   |
|                          | <b>L</b> | 0.9  | - | 98.1 | - | 0.9  |  |
| <b>D-A<sub>3</sub>-D</b> |          |      |   |      |   |      |                                                                                     |
|                          | <b>H</b> | 48.5 | - | 3.0  | - | 48.5 |  |

**Table S5** The overlap of electronic transition density.

|                              |   |  |                                 |                                 |                                 |
|------------------------------|---|------------------------------------------------------------------------------------|---------------------------------|---------------------------------|---------------------------------|
|                              |   | D <sub>1</sub> & B <sub>1</sub>                                                    | B <sub>1</sub> & A <sub>1</sub> | A <sub>1</sub> & B <sub>2</sub> | B <sub>2</sub> & D <sub>2</sub> |
| <b>D-B-A<sub>1</sub>-B-D</b> | L | <b>0.017</b>                                                                       | <b>0.042</b>                    | <b>0.042</b>                    | <b>0.017</b>                    |
|                              | H | 0.000                                                                              | 0.000                           | 0.000                           | <b>0.007</b>                    |
| <b>D-B-A<sub>2</sub>-B-D</b> | L | <b>0.006</b>                                                                       | <b>0.003</b>                    | <b>0.008</b>                    | <b>0.003</b>                    |
|                              | H | <b>0.014</b>                                                                       | 0.000                           | 0.000                           | <b>0.004</b>                    |
| <b>D-B-A<sub>3</sub>-B-D</b> | L | <b>0.003</b>                                                                       | <b>0.010</b>                    | <b>0.010</b>                    | <b>0.003</b>                    |
|                              | H | <b>0.004</b>                                                                       | 0.000                           | 0.000                           | <b>0.004</b>                    |

The percentages of electronic distribution of LUMOs and HOMOs on different fragments for all these investigated compounds were computed by the PyMolyze 1.1 program.

**Table S6** The calculated the atomic charges of the investigated D-B-A<sub>i</sub>-B-D molecules in the ground (S<sub>0</sub>) and singlet excited (S<sub>1</sub>) states using NPA method.

|                              |                  |  |                                  |
|------------------------------|------------------|--------------------------------------------------------------------------------------|----------------------------------|
|                              |                  | B <sub>1</sub> -A <sub>1</sub> -B <sub>2</sub>                                       | D <sub>1</sub> (D <sub>2</sub> ) |
| <b>D-B-A<sub>1</sub>-B-D</b> | S <sub>0</sub>   | 0.452                                                                                | -0.226 (-0.226)                  |
|                              | S <sub>1</sub>   | 0.457                                                                                | -0.228 (-0.229)                  |
|                              | Δ <sup>[1]</sup> | <b>-0.005</b>                                                                        | <b>0.002 (0.003)</b>             |
| <b>D-B-A<sub>2</sub>-B-D</b> | S <sub>0</sub>   | 0.468                                                                                | -0.234 (-0.234)                  |
|                              | S <sub>1</sub>   | 0.478                                                                                | -0.241 (-0.237)                  |
|                              | Δ                | <b>-0.010</b>                                                                        | <b>0.007 (0.003)</b>             |
| <b>D-B-A<sub>3</sub>-B-D</b> | S <sub>0</sub>   | 0.472                                                                                | -0.236 (-0.236)                  |

|          |               |                      |
|----------|---------------|----------------------|
| $S_1$    | 0.481         | -0.241 (-0.240)      |
| $\Delta$ | <b>-0.009</b> | <b>0.005 (0.004)</b> |

[1]The charge differences between  $S_0$  and  $S_1$  states.

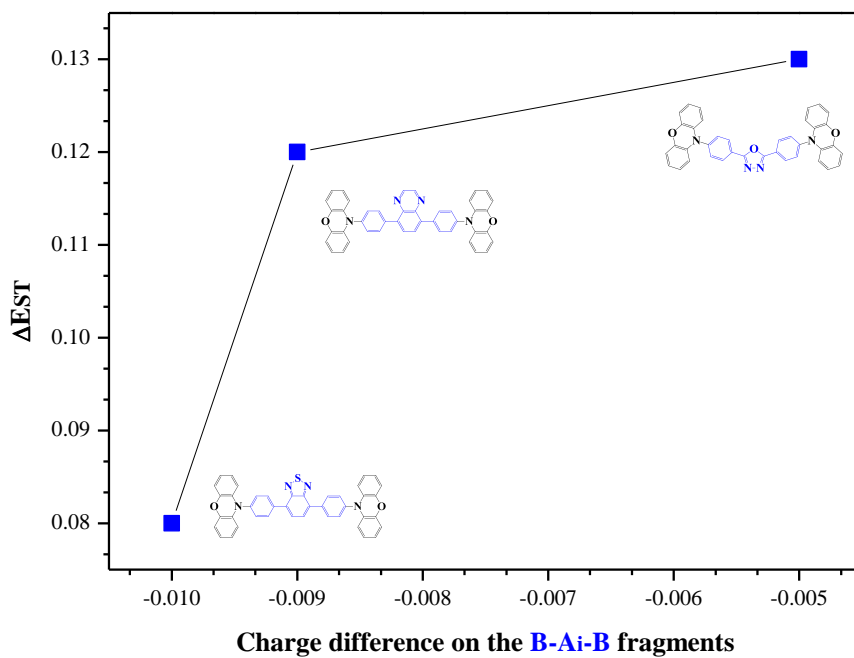

**Fig. S2** The  $\Delta E_{ST}$  values as a function of the charge difference on the B-A<sub>i</sub>-B fragments.

**Reorganization energy**



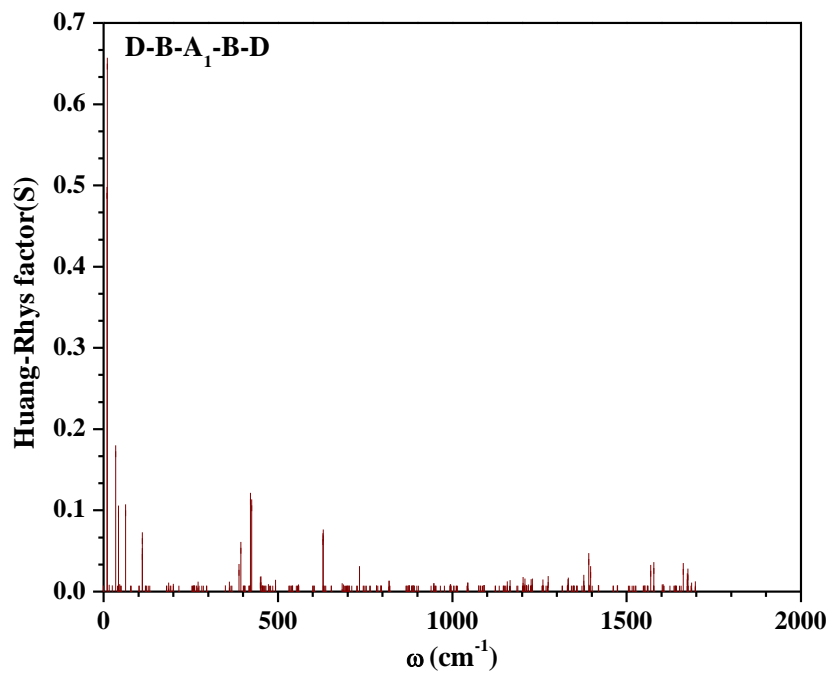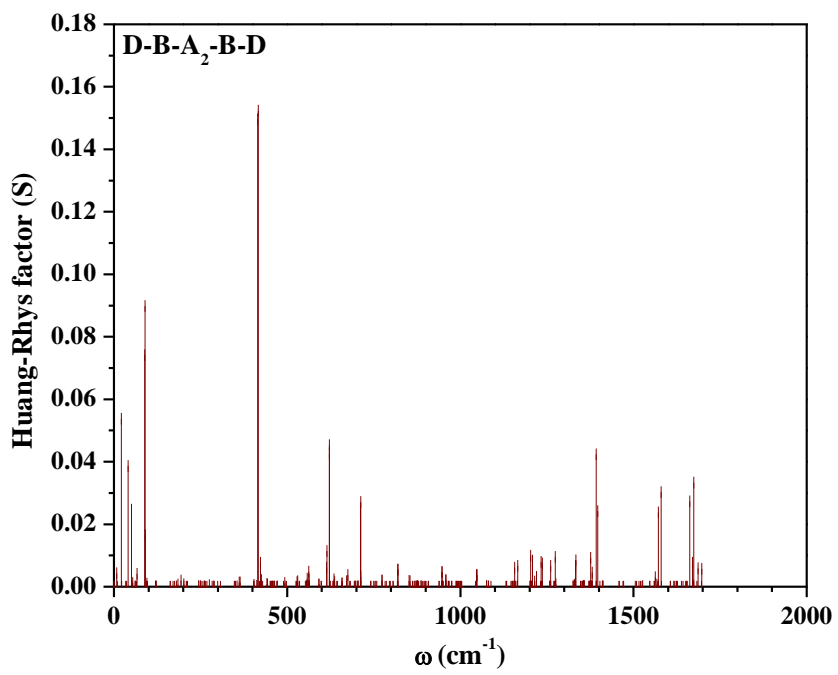

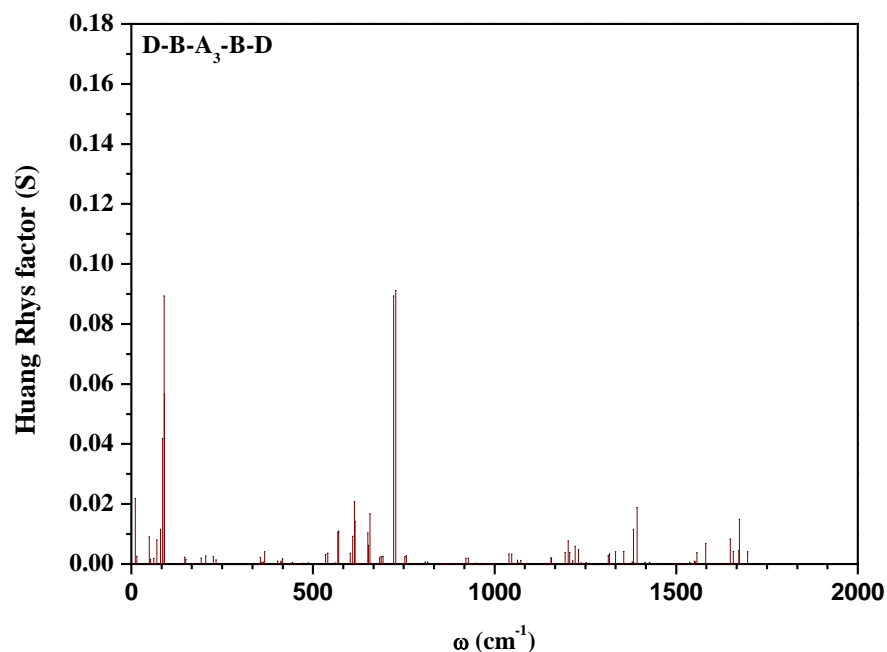

**Fig. S3** The theoretical estimated Huang-Rhys factor ( $S$ ) for all studied D-B-A<sub>i</sub>-B-D molecules.

**Table S7a** The calculated hole reorganization energy via potential energy surface (PES) and normal mode (NM) analysis.

| $\lambda_h$ | D-B-A <sub>1</sub> -B-D | D-B-A <sub>2</sub> -B-D | D-B-A <sub>4</sub> -B-D |
|-------------|-------------------------|-------------------------|-------------------------|
| PES         | 0.100                   | 0.094                   | 0.075                   |
| NM          | 0.097                   | 0.094                   | 0.075                   |

**Table S7b** The DFT estimates of vertical and adiabatic ionization potentials ( $IP_v$  and  $IP_a$ ), electronic affinities ( $EA_v$  and  $EA_a$ ), hole and electron extraction potential (HEP and EEP), reorganization energies ( $\lambda_h$  and  $\lambda_e$ ) (energies in eV).

|                            | $IP_v$             | $IP_a$ | $EA_v$ | $EA_a$ | HEP   | EEP   | $\lambda_h$ | $\lambda_e$ |
|----------------------------|--------------------|--------|--------|--------|-------|-------|-------------|-------------|
|                            | 6.218 <sup>a</sup> | 6.096  | 0.467  | 0.645  | 6.014 | 0.778 | 0.204       | 0.311       |
| <b>D-B-A<sub>1</sub>-B</b> | 6.437 <sup>b</sup> | 6.330  | 0.677  | 0.836  | 6.229 | 0.996 | 0.207       | 0.320       |
|                            | 6.507 <sup>c</sup> | 6.395  | 0.443  | 0.615  | 6.285 | 0.825 | 0.222       | 0.382       |
|                            | 6.066              | 5.945  | 1.073  | 1.277  | 5.869 | 1.485 | 0.197       | 0.412       |
| <b>D-B-A<sub>2</sub>-B</b> | 6.286              | 6.187  | 1.281  | 1.507  | 6.086 | 1.714 | 0.200       | 0.434       |
|                            | 6.351              | 6.245  | 1.173  | 1.392  | 6.138 | 1.629 | 0.213       | 0.457       |
|                            | 6.035              | 5.922  | 0.693  | 1.081  | 5.858 | 1.254 | 0.177       | 0.561       |
| <b>D-B-A<sub>3</sub>-B</b> | 6.257              | 6.160  | 0.933  | 1.164  | 6.061 | 1.393 | 0.196       | 0.460       |
|                            | 6.321              | 6.219  | 0.777  | 0.997  | 6.112 | 1.255 | 0.210       | 0.477       |

**Table S8** The selected hole reorganization energies  $\lambda_h(j)$ , Huang-Rhys factor ( $S$ ), associated with vibrational mode ( $\omega$ ) using NM analysis (in  $\text{cm}^{-1}$ ).

| $\omega$         | D-B-A <sub>1</sub> -B-D |       | D-B-A <sub>2</sub> -B-D |       | D-B-A <sub>3</sub> -B-D |       |
|------------------|-------------------------|-------|-------------------------|-------|-------------------------|-------|
|                  | $\lambda_{h(j)}$        | $S$   | $\lambda_{h(j)}$        | $S$   | $\lambda_{h(j)}$        | $S$   |
| <b>388-394</b>   | 31.7                    | 0.081 | -                       | -     | -                       | -     |
| <b>415-427</b>   | 93.2                    | 0.220 | 129.6                   | 0.312 | 0.8                     | 0.002 |
| <b>614-657</b>   | 84.2                    | 0.134 | 68.4                    | 0.111 | 21.6                    | 0.035 |
| <b>712-735</b>   | 34.0                    | 0.046 | 39.0                    | 0.055 | 131.0                   | 0.181 |
| <b>1203-1230</b> | 46.3                    | 0.038 | 37.7                    | 0.031 | 28.8                    | 0.024 |
| <b>1274-1333</b> | 38.5                    | 0.029 | 14.7                    | 0.012 | 14.1                    | 0.014 |
| <b>1376-1397</b> | 110.8                   | 0.080 | 112.2                   | 0.121 | 43.7                    | 0.044 |
| <b>1568-1581</b> | 86.6                    | 0.055 | 85.3                    | 0.054 | 10.9                    | 0.007 |
| <b>1662-1676</b> | 131.7                   | 0.079 | 115.1                   | 0.070 | 32.7                    | 0.020 |

## Mobility

**Table S9** The hole and electron mobility of D-B-A<sub>1</sub>-B-D via FGR and Marcus theory at the different temperature.

| T               | $\mu_{\text{hole}} (\text{cm}^2/\text{Vs})$ | $\mu_{\text{electron}} (\text{cm}^2/\text{Vs})$ | $\mu_{\text{hole}} (\text{cm}^2/\text{Vs})$ | $\mu_{\text{electron}} (\text{cm}^2/\text{Vs})$ |
|-----------------|---------------------------------------------|-------------------------------------------------|---------------------------------------------|-------------------------------------------------|
|                 | FGR                                         |                                                 | Marcus                                      |                                                 |
| 300 K           | 0.00281                                     | 0.01075                                         | 0.001465                                    | 0.0028166                                       |
| <b>298.15 K</b> | <b>0.00285</b>                              | <b>0.01085</b>                                  | <b>0.0014698</b>                            | <b>0.0027905</b>                                |
| 250 K           | 0.00395                                     | 0.01419                                         | 0.0015871                                   | 0.0020328                                       |
| 200 K           | 0.00594                                     | 0.02016                                         | 0.0016595                                   | 0.0011558                                       |
| 150 K           | 0.00989                                     | 0.0327                                          | 0.0015754                                   | 0.00039745                                      |
| 100 K           | 0.01978                                     | 0.06815                                         | 0.0011003                                   | 0.000036427                                     |
| 50 K            | 0.05975                                     | 0.23499                                         | 0.00017103                                  | 0.00000012794                                   |

**Table S10** The main hole and electron transfer integrals ( $V_h$  and  $V_e$ ) for the main three nearest pathways of D-B-A<sub>1</sub>-B-D.

|                         | Distance ( $\text{\AA}$ ) | $V_h$       | $V_e$   |
|-------------------------|---------------------------|-------------|---------|
| D-B-A <sub>1</sub> -B-D | 9.068                     | 0.000074504 | -0.0032 |
|                         | 7.599                     | -0.0014     | 0.0077  |
|                         | 7.984                     | 0.000017480 | 0.0065  |

|                              |        |         |              |
|------------------------------|--------|---------|--------------|
| <b>D-B-A<sub>2</sub>-B-D</b> | 3.876  | 0.0121  | 0.2041       |
|                              | 3.876  | 0.0121  | 0.2041       |
|                              | 12.690 | -0.0023 | -0.000030478 |
| <b>D-B-A<sub>3</sub>-B-D</b> | 4.410  | -0.0141 | 0.0267       |
|                              | 7.193  | -0.0617 | -0.0897      |
|                              | 5.331  | -0.0169 | -0.0168      |

### Normal mode analysis

| <b>D-B-A<sub>1</sub>-B-D (2PXZ-OXD)</b> |                                      |          | <b>D-B-A<sub>2</sub>-B-D</b> |                                      |          |
|-----------------------------------------|--------------------------------------|----------|------------------------------|--------------------------------------|----------|
| $\omega$ (cm <sup>-1</sup> )            | $\lambda_{h(i)}$ (cm <sup>-1</sup> ) | <i>S</i> | $\omega$ (cm <sup>-1</sup> ) | $\lambda_{h(i)}$ (cm <sup>-1</sup> ) | <i>S</i> |
| 10                                      | 4.9                                  | 0.49104  | 21                           | 1.1                                  | 0.05379  |
| 11                                      | 7.4                                  | 0.6498   | 41                           | 1.6                                  | 0.03864  |
| 35                                      | 6                                    | 0.17287  | 51                           | 1.3                                  | 0.02464  |
| 43                                      | 4.2                                  | 0.09857  | 54                           | 0.1                                  | 0.00115  |
| 46                                      | 0.1                                  | 0.00192  | 67                           | 0.3                                  | 0.00414  |
| 63                                      | 6.4                                  | 0.10035  | 89                           | 6.6                                  | 0.07411  |
| 111                                     | 5.1                                  | 0.04621  | 90                           | 8.1                                  | 0.08989  |
| 111                                     | 7.3                                  | 0.06588  | 91                           | 1.5                                  | 0.01656  |
| 187                                     | 0.7                                  | 0.00378  | 95                           | 0.1                                  | 9.68E-04 |
| 200                                     | 0.5                                  | 0.00238  | 185                          | 0.1                                  | 6.48E-04 |
| 258                                     | 0.1                                  | 4.50E-04 | 194                          | 0.4                                  | 0.00198  |
| 260                                     | 0.1                                  | 3.13E-04 | 202                          | 0.2                                  | 8.00E-04 |
| 271                                     | 1.3                                  | 0.0049   | 275                          | 0.1                                  | 4.81E-04 |
| 349                                     | 0.1                                  | 2.42E-04 | 362                          | 0.5                                  | 0.00135  |
| 361                                     | 1.8                                  | 0.0051   | 364                          | 0.5                                  | 0.00135  |
| 388                                     | 10.5                                 | 0.02691  | 404                          | 0.2                                  | 5.45E-04 |
| 394                                     | 21.2                                 | 0.05379  | 412                          | 0.1                                  | 2.88E-04 |
| 421                                     | 48.1                                 | 0.11424  | 415                          | 62                                   | 0.1496   |
| 425                                     | 45.1                                 | 0.10626  | 417                          | 63.5                                 | 0.15235  |
| 450                                     | 5                                    | 0.01125  | 423                          | 3.2                                  | 0.00769  |
| 451                                     | 5.2                                  | 0.01155  | 426                          | 0.9                                  | 0.00218  |
| 473                                     | 0.8                                  | 0.00174  | 442                          | 0.4                                  | 8.82E-04 |
| 493                                     | 3.5                                  | 0.00708  | 443                          | 0.3                                  | 7.22E-04 |
| 555                                     | 0.1                                  | 9.80E-05 | 493                          | 0.6                                  | 0.0012   |
| 559                                     | 0.8                                  | 0.00146  | 529                          | 0.8                                  | 0.00151  |
| 629                                     | 40.7                                 | 0.0648   | 530                          | 0.9                                  | 0.00174  |
| 630                                     | 43.5                                 | 0.06919  | 555                          | 0.2                                  | 2.88E-04 |

---

|      |      |          |      |      |          |
|------|------|----------|------|------|----------|
| 684  | 2    | 0.00289  | 558  | 1.5  | 0.00259  |
| 688  | 1    | 0.00151  | 562  | 2.7  | 0.0048   |
| 712  | 0.1  | 1.28E-04 | 563  | 1.2  | 0.00224  |
| 712  | 0.1  | 1.45E-04 | 592  | 0.4  | 7.22E-04 |
| 734  | 16.2 | 0.02205  | 592  | 0.4  | 6.85E-04 |
| 735  | 17.6 | 0.02398  | 614  | 3.7  | 0.00605  |
| 783  | 0.2  | 3.13E-04 | 615  | 7    | 0.0114   |
| 795  | 0.3  | 3.92E-04 | 622  | 26.5 | 0.04263  |
| 818  | 4.8  | 0.00594  | 622  | 28.2 | 0.0453   |
| 819  | 5    | 0.00605  | 635  | 1.5  | 0.00238  |
| 876  | 0.2  | 2.00E-04 | 637  | 0.9  | 0.00146  |
| 876  | 0.6  | 7.22E-04 | 658  | 0.6  | 9.68E-04 |
| 888  | 0.8  | 9.25E-04 | 658  | 0.7  | 0.00106  |
| 947  | 2.9  | 0.00304  | 672  | 1.1  | 0.00174  |
| 947  | 3    | 0.00312  | 675  | 2.5  | 0.0037   |
| 994  | 1.6  | 0.00168  | 697  | 0.1  | 1.13E-04 |
| 995  | 1.7  | 0.00174  | 705  | 0.2  | 2.42E-04 |
| 1044 | 4.1  | 0.00387  | 712  | 17.4 | 0.02442  |
| 1045 | 4.2  | 0.00396  | 713  | 2.3  | 0.0032   |
| 1076 | 0.4  | 3.65E-04 | 713  | 19.3 | 0.02714  |
| 1081 | 0.1  | 6.05E-05 | 774  | 1.5  | 0.00198  |
| 1090 | 0.6  | 5.78E-04 | 774  | 1.5  | 0.00198  |
| 1092 | 0.6  | 5.78E-04 | 819  | 4.5  | 0.00551  |
| 1158 | 0.6  | 5.45E-04 | 820  | 4.4  | 0.00541  |
| 1158 | 6.4  | 0.00551  | 852  | 1.6  | 0.00186  |
| 1166 | 7.9  | 0.00684  | 855  | 1.5  | 0.00174  |
| 1185 | 0.1  | 5.00E-05 | 875  | 0.1  | 8.45E-05 |
| 1203 | 12.8 | 0.01066  | 876  | 0.2  | 1.81E-04 |
| 1208 | 10.6 | 0.00871  | 887  | 0.2  | 1.81E-04 |
| 1213 | 0.7  | 5.78E-04 | 947  | 4.3  | 0.00461  |
| 1218 | 1.8  | 0.00146  | 947  | 4.5  | 0.0047   |
| 1226 | 9.7  | 0.00794  | 948  | 0.2  | 2.65E-04 |
| 1230 | 10.7 | 0.00871  | 958  | 2    | 0.00211  |
| 1260 | 0.3  | 2.42E-04 | 959  | 2    | 0.00211  |
| 1260 | 9.5  | 0.00756  | 1047 | 3.9  | 0.0037   |
| 1275 | 14.8 | 0.0117   | 1048 | 3.9  | 0.0037   |
| 1332 | 10.6 | 0.00794  | 1076 | 0.3  | 3.13E-04 |
| 1333 | 13.1 | 0.0098   | 1081 | 0.1  | 6.05E-05 |
| 1342 | 0.1  | 5.00E-05 | 1154 | 0.1  | 5.00E-05 |

---

|      |      |          |      |      |          |
|------|------|----------|------|------|----------|
| 1377 | 18.6 | 0.01345  | 1157 | 7    | 0.00605  |
| 1378 | 0.4  | 2.65E-04 | 1166 | 7.9  | 0.00673  |
| 1391 | 56.1 | 0.04033  | 1201 | 0.1  | 1.28E-04 |
| 1392 | 1.8  | 0.0013   | 1203 | 12   | 0.00994  |
| 1397 | 33.9 | 0.0242   | 1205 | 0.1  | 5.00E-05 |
| 1419 | 1.1  | 7.61E-04 | 1208 | 10   | 0.00832  |
| 1420 | 0.5  | 3.13E-04 | 1215 | 2    | 0.00168  |
| 1473 | 0.6  | 3.92E-04 | 1220 | 3.8  | 0.00312  |
| 1474 | 0.5  | 3.65E-04 | 1233 | 9.8  | 0.00794  |
| 1526 | 0.2  | 1.62E-04 | 1237 | 9.3  | 0.00744  |
| 1549 | 0.2  | 1.45E-04 | 1258 | 0.1  | 8.45E-05 |
| 1552 | 0.6  | 3.65E-04 | 1261 | 8.5  | 0.00673  |
| 1569 | 40.5 | 0.02576  | 1274 | 12.1 | 0.00952  |
| 1578 | 0.1  | 3.20E-05 | 1276 | 1    | 7.61E-04 |
| 1578 | 46   | 0.02904  | 1326 | 0.3  | 2.42E-04 |
| 1602 | 2.1  | 0.00135  | 1329 | 0.9  | 6.85E-04 |
| 1605 | 3.2  | 0.00198  | 1330 | 0.4  | 3.38E-04 |
| 1662 | 46.4 | 0.02785  | 1332 | 0.2  | 1.62E-04 |
| 1674 | 25.3 | 0.01514  | 1333 | 9    | 0.00673  |
| 1675 | 19.6 | 0.0117   | 1334 | 11.3 | 0.00845  |
| 1676 | 35.1 | 0.02101  | 1356 | 0.4  | 2.65E-04 |
| 1686 | 6.6  | 0.00396  | 1358 | 0.5  | 3.38E-04 |
| 1697 | 8.9  | 0.0052   | 1372 | 0.2  | 1.28E-04 |
| 3173 | 0.6  | 2.00E-04 | 1376 | 0.4  | 2.65E-04 |
| 3184 | 0.6  | 1.81E-04 | 1376 | 12.7 | 0.00925  |
|      |      |          | 1379 | 0.2  | 1.45E-04 |
|      |      |          | 1381 | 6.2  | 0.00451  |
|      |      |          | 1392 | 58.8 | 0.04234  |
|      |      |          | 1397 | 33.9 | 0.0242   |
|      |      |          | 1410 | 0.1  | 6.05E-05 |
|      |      |          | 1412 | 0.1  | 5.00E-05 |
|      |      |          | 1526 | 0.3  | 1.81E-04 |
|      |      |          | 1563 | 4.7  | 0.00304  |
|      |      |          | 1567 | 1    | 6.48E-04 |
|      |      |          | 1572 | 37.4 | 0.02376  |
|      |      |          | 1580 | 47.9 | 0.03026  |
|      |      |          | 1662 | 45.7 | 0.02738  |
|      |      |          | 1670 | 12.8 | 0.00769  |
|      |      |          | 1672 | 0.8  | 4.81E-04 |

|  |      |      |          |
|--|------|------|----------|
|  | 1674 | 55.8 | 0.03328  |
|  | 1686 | 10   | 0.00594  |
|  | 1697 | 9.8  | 0.00572  |
|  | 3173 | 0.2  | 5.00E-05 |
|  | 3174 | 0.5  | 1.62E-04 |
|  | 3184 | 0.1  | 3.20E-05 |
|  | 3185 | 0.5  | 1.62E-04 |

**D-B-A<sub>3</sub>-B-D**

| $\omega$ (cm <sup>-1</sup> ) | $\lambda_{h(i)}$ (cm <sup>-1</sup> ) | $S$      |
|------------------------------|--------------------------------------|----------|
| 15                           | 0.05                                 | 0.0026   |
| 11                           | 0.25                                 | 0.0219   |
| 49                           | 0.45                                 | 0.00912  |
| 53                           | 0.1                                  | 0.0016   |
| 62                           | 0.1                                  | 0.00194  |
| 70                           | 0.55                                 | 0.0081   |
| 80                           | 0.95                                 | 0.01166  |
| 86                           | 3.6                                  | 0.04182  |
| 90                           | 8.05                                 | 0.0894   |
| 91                           | 5.15                                 | 0.05664  |
| 147                          | 0.35                                 | 0.0023   |
| 150                          | 0.25                                 | 0.0016   |
| 192                          | 0.4                                  | 0.00207  |
| 205                          | 0.55                                 | 0.00276  |
| 226                          | 0.6                                  | 0.00255  |
| 233                          | 0.35                                 | 0.00144  |
| 246                          | 0.05                                 | 1.00E-04 |
| 268                          | 0.05                                 | 1.00E-04 |
| 290                          | 0.05                                 | 2.40E-04 |
| 355                          | 0.8                                  | 0.00226  |
| 357                          | 0.2                                  | 6.25E-04 |
| 363                          | 0.25                                 | 7.29E-04 |
| 367                          | 1.5                                  | 0.00416  |
| 403                          | 0.4                                  | 0.00102  |
| 411                          | 0.2                                  | 4.41E-04 |
| 412                          | 0.45                                 | 0.00106  |
| 416                          | 0.75                                 | 0.00185  |
| 422                          | 0.05                                 | 1.69E-04 |
| 427                          | 0.05                                 | 1.10E-04 |
| 443                          | 0.15                                 | 3.42E-04 |

---

|     |       |          |
|-----|-------|----------|
| 444 | 0.25  | 5.76E-04 |
| 456 | 0.05  | 7.23E-05 |
| 458 | 0.05  | 1.21E-04 |
| 472 | 0.15  | 2.72E-04 |
| 484 | 0.05  | 1.44E-04 |
| 487 | 0.2   | 3.61E-04 |
| 494 | 0.1   | 2.10E-04 |
| 535 | 1.7   | 0.00319  |
| 541 | 2     | 0.00366  |
| 561 | 0.2   | 3.80E-04 |
| 568 | 6     | 0.01061  |
| 571 | 6.3   | 0.01102  |
| 603 | 2.15  | 0.0036   |
| 609 | 5.7   | 0.00931  |
| 614 | 12.8  | 0.02088  |
| 616 | 8.8   | 0.01428  |
| 629 | 0.05  | 4.90E-05 |
| 651 | 6.75  | 0.0104   |
| 653 | 0.75  | 0.00116  |
| 653 | 4.1   | 0.00624  |
| 657 | 11.05 | 0.01677  |
| 684 | 1.45  | 0.00216  |
| 688 | 1.7   | 0.0025   |
| 693 | 1.8   | 0.0026   |
| 713 | 0.1   | 1.10E-04 |
| 722 | 64.45 | 0.0894   |
| 728 | 66.45 | 0.0912   |
| 753 | 1.9   | 0.0025   |
| 757 | 2.2   | 0.00286  |
| 809 | 0.6   | 7.56E-04 |
| 816 | 0.6   | 7.29E-04 |
| 836 | 0.1   | 1.21E-04 |
| 839 | 0.05  | 5.63E-05 |
| 865 | 0.05  | 4.23E-05 |
| 921 | 1.75  | 0.00189  |
| 928 | 1.9   | 0.00202  |
| 940 | 0.15  | 1.44E-04 |
| 943 | 0.2   | 1.96E-04 |
| 948 | 0.3   | 3.24E-04 |



---

|      |      |          |
|------|------|----------|
| 1040 | 3.55 | 0.00342  |
| 1047 | 3.55 | 0.00336  |
| 1063 | 1.35 | 0.0013   |
| 1066 | 0.45 | 4.20E-04 |
| 1072 | 1.3  | 0.00119  |
| 1081 | 0.15 | 1.21E-04 |
| 1132 | 0.3  | 2.40E-04 |
| 1139 | 0.25 | 1.96E-04 |
| 1145 | 0.05 | 3.03E-05 |
| 1155 | 2.45 | 0.00212  |
| 1157 | 2.15 | 0.00189  |
| 1193 | 0.05 | 5.63E-05 |
| 1194 | 4.75 | 0.00397  |
| 1200 | 0.1  | 9.03E-05 |
| 1203 | 9.45 | 0.00783  |
| 1207 | 4.8  | 0.00397  |
| 1215 | 1.35 | 0.00112  |
| 1222 | 7.3  | 0.00601  |
| 1231 | 5.9  | 0.00483  |
| 1239 | 0.45 | 3.61E-04 |
| 1252 | 0.65 | 5.29E-04 |
| 1253 | 0.05 | 3.03E-05 |
| 1257 | 0.1  | 6.40E-05 |
| 1260 | 0.1  | 9.03E-05 |
| 1307 | 0.05 | 2.03E-05 |
| 1313 | 3.8  | 0.00292  |
| 1316 | 4.5  | 0.00342  |
| 1325 | 0.1  | 7.23E-05 |
| 1330 | 0.05 | 2.03E-05 |
| 1333 | 5.55 | 0.00416  |
| 1339 | 0.05 | 2.03E-05 |
| 1345 | 0.05 | 3.03E-05 |
| 1347 | 0.05 | 4.90E-05 |
| 1349 | 0.05 | 2.03E-05 |
| 1356 | 5.75 | 0.00423  |
| 1360 | 0.05 | 4.23E-05 |
| 1360 | 0.1  | 7.23E-05 |
| 1370 | 0.15 | 1.10E-04 |
| 1379 | 1    | 7.29E-04 |

---

|      |       |          |
|------|-------|----------|
| 1382 | 16.05 | 0.01166  |
| 1386 | 0.45  | 3.42E-04 |
| 1392 | 26.25 | 0.01891  |
| 1414 | 0.8   | 5.76E-04 |
| 1427 | 0.85  | 6.00E-04 |
| 1455 | 0.1   | 6.40E-05 |
| 1464 | 0.1   | 7.23E-05 |
| 1516 | 0.2   | 1.21E-04 |
| 1520 | 0.05  | 2.03E-05 |
| 1537 | 0.85  | 5.76E-04 |
| 1550 | 1.65  | 0.00106  |
| 1553 | 1.2   | 7.56E-04 |
| 1557 | 6     | 0.00384  |
| 1581 | 10.9  | 0.00689  |
| 1627 | 0.1   | 6.40E-05 |
| 1640 | 0.1   | 6.40E-05 |
| 1649 | 13.75 | 0.00837  |
| 1657 | 6.95  | 0.00423  |
| 1672 | 0.1   | 4.90E-05 |
| 1672 | 7.6   | 0.00456  |
| 1674 | 25    | 0.01501  |
| 1697 | 6.95  | 0.0041   |
